# Supplementary material for: A Spontaneous Inversion of the X Chromosome Heterochromatin Provides a Tool for Studying the Structure and Activity of the Nucleolus in Drosophila melanogaster
Source: MDPI journal article supplement (doi:10.3390/cells11233872), 2022-12-01
Supplement: s1 [file s1]

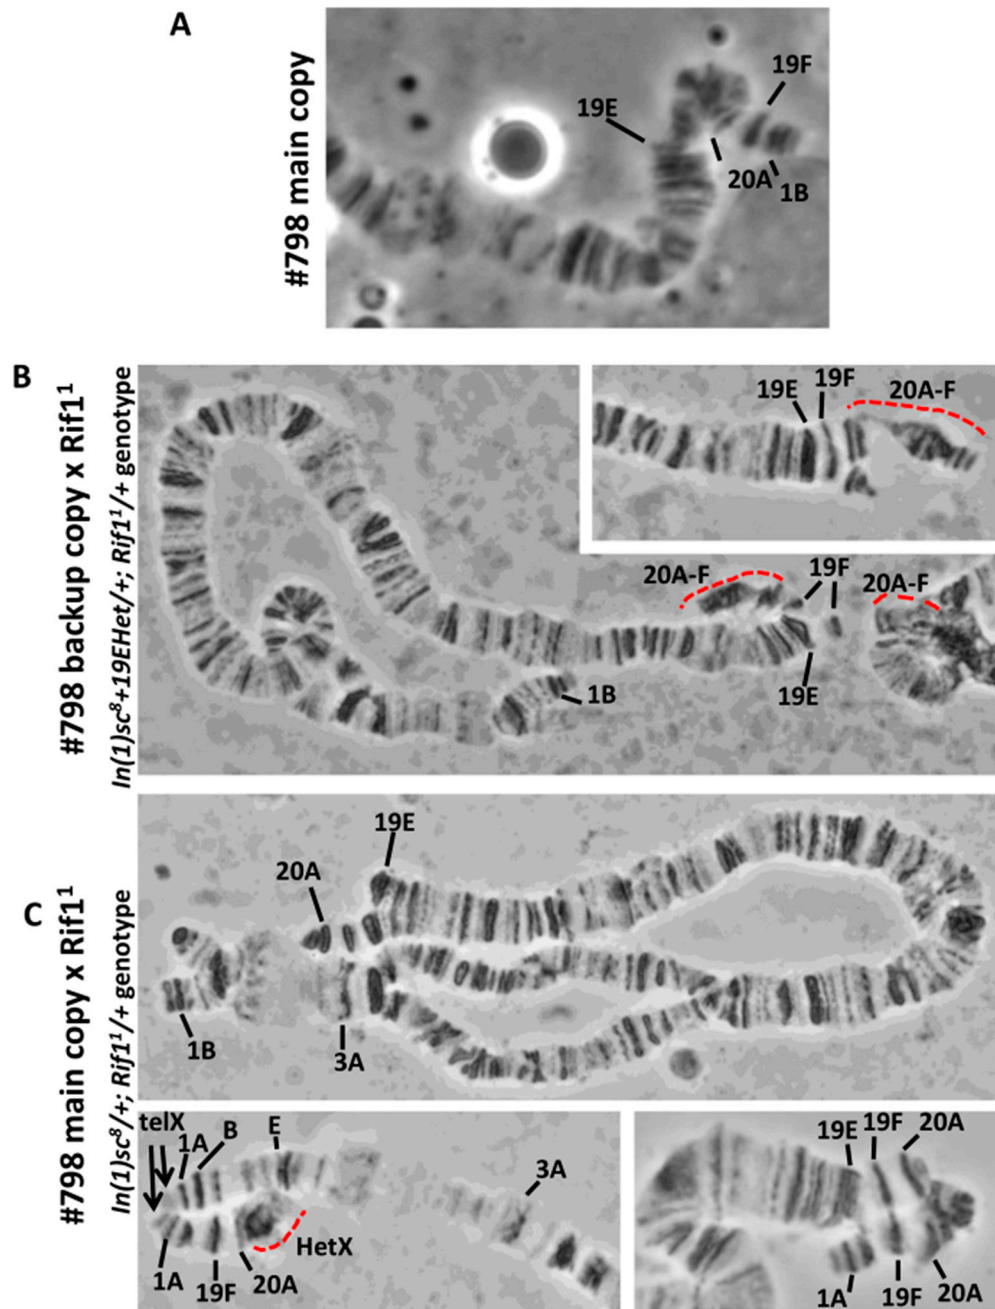

**Figure S1.** Cytological verification of the original #798 sublines from the BDSC for the presence of the additional inversion  $In(1)19EHet$ . (A) Without suppression of underreplication, it is difficult to unambiguously judge the presence or absence of the  $In(1)19EHet$  inversion in the subline #798 main copy. (B,C) The results of crossing #798 backup copy (B) or #798 main copy (C) with the  $Rif1^1$  mutant. The offspring carrying both the inverted X chromosomes and  $Rif1^1$  mutation in heterozygous states were analyzed. Partial heterochromatin polytenization in  $Rif1^1/+$  heterozygotes allowed us to conclude that only line #798 main copy carries the double inversion, while line #798 backup copy carries only the original  $In(1)sc^8$  inversion

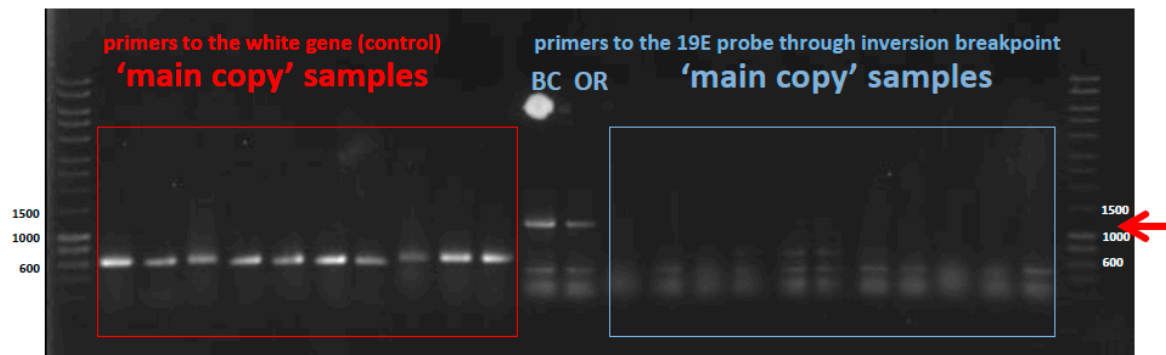

**Figure S2.** Examples of PCR amplifications from a sampling of lines started with single-pair matings from the 798 main copy vials. Control genotypes include flies from the 798 backup copy and Oregon-R (OR) flies. P1–P2 primers were used for PCR through the inversion breakpoint. Primers for the *white* gene were used to verify that the DNA samples could be used in PCR amplifications successfully.

wt

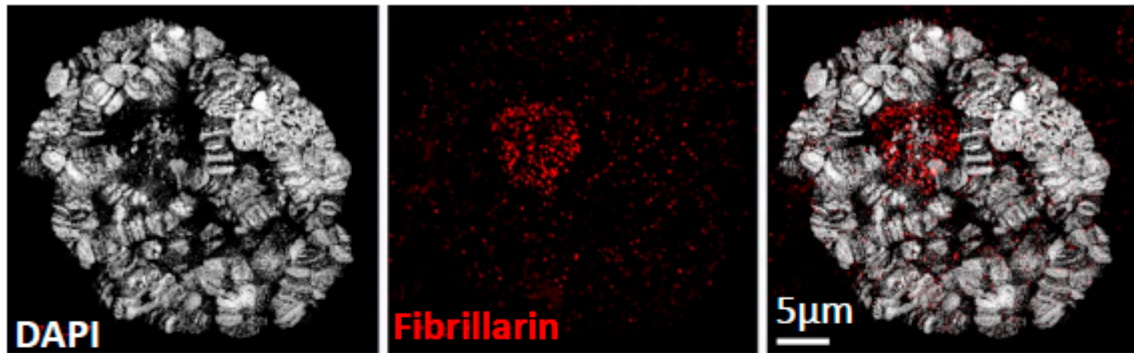

*In(1)sc<sup>8-19E</sup>; Rif1<sup>1</sup>*

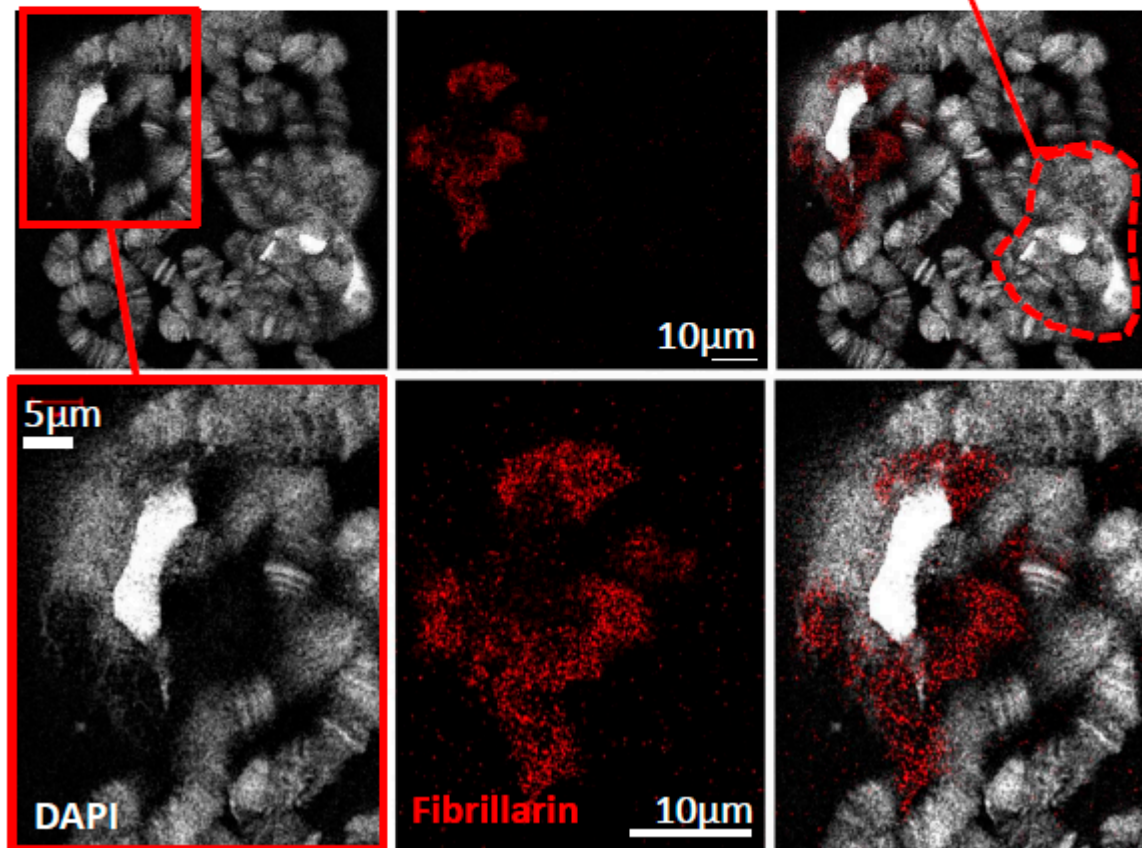

**Figure S3.** Localization of the nucleolus within nuclei of *Rif1<sup>1</sup>* mutants carrying wild-type (A) or *In(1)sc<sup>8</sup> + 19EHet* (B) chromosomes in slightly squashed preparations of polytene chromosomes. Individual optical sections obtained by DAPI staining with subsequent 3D-SIM microscopy are shown. The nucleolus is marked by fibrillarin immunostaining.

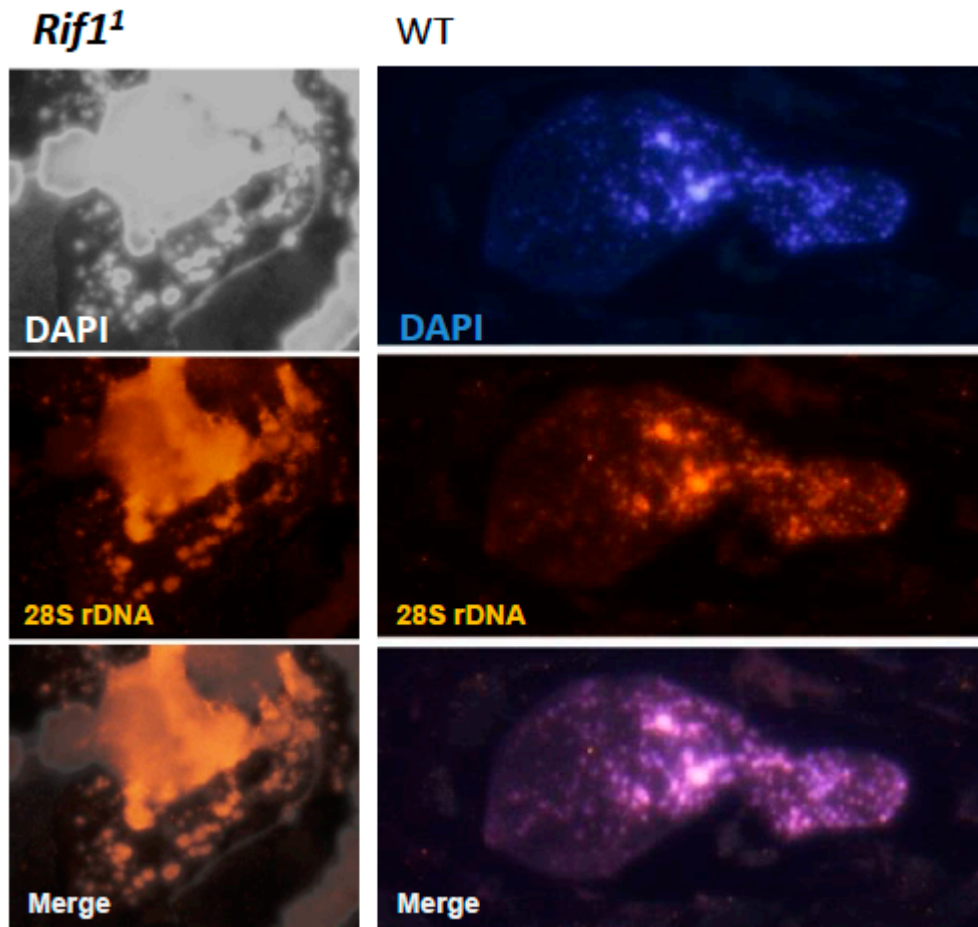

**Figure S4.** FISH with 28S rDNA probe (red) in *Rif1*<sup>1</sup> mutant and wild-type polytene chromosomes. The DAPI channel is overexposed to detect weakly stained structures. In both *Rif1*<sup>1</sup> and wild-type nucleoli, FISH signal strongly coincides with DAPI staining.
